# Supplementary material
Source: Springer Nature journal article supplement (https://www.springermedizin.de/resource/supplementary/12885_2013_4391_MOESM4_ESM.pdf/9466172)

CD99

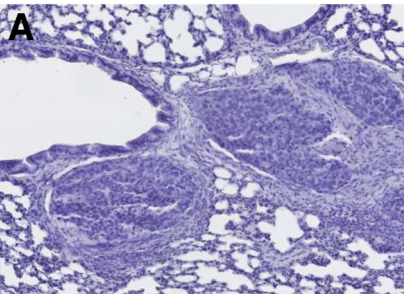

CD99+

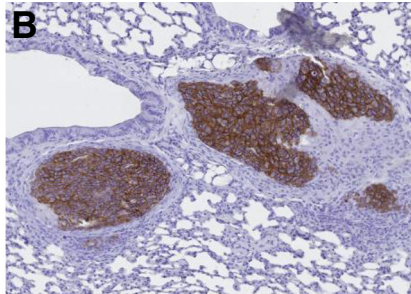

Control

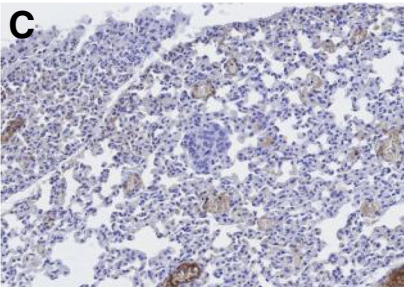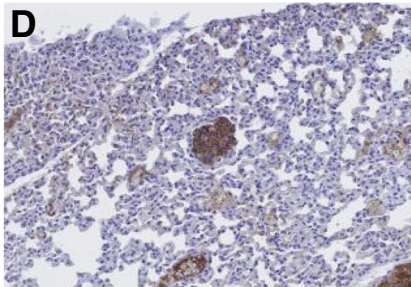

ZA

Supplement: MOESM4 [file 9466172]
